# Supplementary material
Source: MDPI journal article supplement (https://www.mdpi.com/2073-445X/12/5/1050)
Supplement: s1 [file s1]

**Table S1.** Paper status of the main countries for land use change detection (LUCD) during 1985 to 2022.

| Country        | Articles | Total Citations | Average Article Citations |
|----------------|----------|-----------------|---------------------------|
| China          | 758      | 15869           | 20.94                     |
| USA            | 693      | 43893           | 63.34                     |
| India          | 224      | 3579            | 15.98                     |
| Germany        | 160      | 6608            | 41.3                      |
| Canada         | 140      | 6753            | 48.24                     |
| Italy          | 137      | 5442            | 39.72                     |
| United Kingdom | 95       | 3419            | 35.99                     |
| Iran           | 93       | 1055            | 11.34                     |
| Australia      | 85       | 4233            | 49.8                      |
| Turkey         | 83       | 1512            | 18.22                     |
