# Supplementary material
Source: MDPI journal article supplement (https://www.mdpi.com/2073-445X/12/5/1050)
Supplement: s1 [file s1]

**Table S2. Number of articles published by the top 10 institutions for land use change detection (LUCD) during 1985 to 2022.**

| <b>Affiliations</b>                 | <b>Articles</b> |
|-------------------------------------|-----------------|
| WUHAN UNIV                          | 195             |
| UNIV MARYLAND                       | 94              |
| UNIV CHINESE ACAD SCI               | 88              |
| BEIJING NORMAL UNIV                 | 85              |
| CHINA UNIV GEOSCI                   | 54              |
| GODDARD SPACE FLIGHT CTR            | 54              |
| INST GEOG SCI AND NAT RESOURCES RES | 52              |
| BOSTON UNIV                         | 50              |
| NANJING UNIV                        | 49              |
| CHINESE ACAD SCI                    | 44              |
